# Supplementary material
Source: PubMed Central journal article supplement (PMC4074062)

Supplementary Figure 1 Bowcutt *et al*

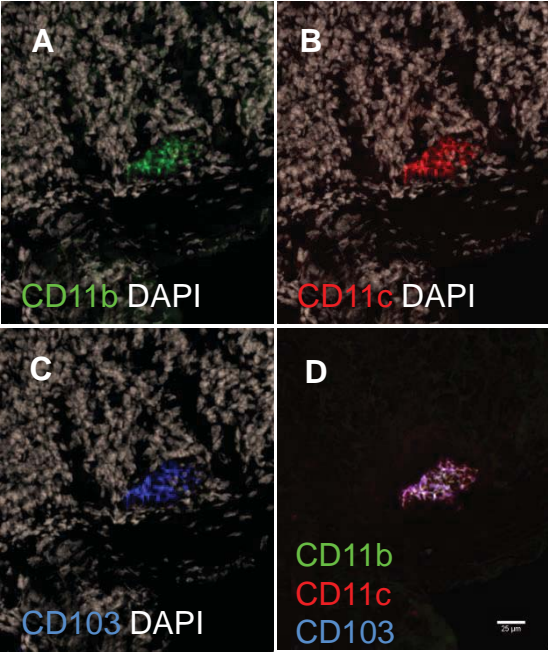

Supplement: NIHMS56092-supplement-01.pdf [file NIHMS56092-supplement-01.pdf]
